# Supplementary material for: Non-covalent interactions in molecular systems: thermodynamic evaluation of the hydrogen bond strength in aminoalcohols
Source: Royal Society of Chemistry journal article supplement (doi:10.1039/d1cp03817f), 2021-01-01
Supplement: d1cp03817f1.pdf [file d1cp03817f1.pdf]

## Electronic Supporting Information:

### Non-Covalent Interactions in Molecular Systems: Thermodynamic Evaluation of the Hydrogen Bond Strength in Aminoalcohols

Riko Siewert,<sup>a,b,\*</sup> Ralf Ludwig,<sup>a,b,c</sup> Sergey P. Verevkin,<sup>a,b,\*</sup>

<sup>a</sup> Universität Rostock, Institut für Chemie, Abteilung für Physikalische Chemie, Dr.-Lorenz-Weg 2, 18059, Rostock, Germany

<sup>b</sup> Department LL&M, Competence Centre CALOR, University of Rostock, Albert-Einstein-Str. 25, 18059, Rostock, Germany

<sup>c</sup> Leibniz-Institut für Katalyse an der Universität Rostock e.V., Albert-Einstein-Str. 29a, 18059 Rostock, Germany

E-mail address: [riko.siewert@uni-rostock.de](mailto:riko.siewert@uni-rostock.de) (R. Siewert)

E-mail address: [sergey.verevkin@uni-rostock.de](mailto:sergey.verevkin@uni-rostock.de) (S.P. Verevkin)

**Table S1. Comparison of the Intra-Molecular Hydrogen Bond Strength in Amino-Alcohols Derived from Different Thermodynamic Methods (in kJ·mol<sup>-1</sup>)**

| Compound and type of bond           | Solvent                        | Method  | $\Delta H_{HB}$ | Ref.      |
|-------------------------------------|--------------------------------|---------|-----------------|-----------|
| 2-amino-ethanol (OH-N)              | C <sub>2</sub> Cl <sub>4</sub> | FTIR    | -11.1±3.0       | this work |
|                                     | C <sub>2</sub> Cl <sub>4</sub> | IR      | -2.9±0.4        | 1         |
|                                     | CCl <sub>4</sub>               | IR      | -6.7±0.2        | 2         |
|                                     | gas                            | SCF     | -7.3            | 3         |
|                                     | gas                            | RHF     | -11.3           | 4         |
|                                     | gas                            | MP2     | -15.4           | 5         |
|                                     | gas                            | DFT     | -12.9           | 6         |
|                                     | gas                            | CCSD(T) | -7.9            | 7         |
| 2-amino-ethanol (NH-O)              | C <sub>2</sub> Cl <sub>4</sub> | FTIR    | -8.9±4.1        | this work |
|                                     | gas                            | MP2     | -3.2            | 5         |
| 2-(dimethyl-amino)-1-ethanol (OH-N) | C <sub>2</sub> Cl <sub>4</sub> | FTIR    | -15.1±1.2       | this work |
|                                     | C <sub>2</sub> Cl <sub>4</sub> | IR      | -11.7±0.8       | 1         |
|                                     | CCl <sub>4</sub>               | IR      | -21.5±2.5       | 2         |
|                                     | C <sub>2</sub> Cl <sub>4</sub> | IR      | -17.7           | 8         |

**Table S2. Provenance and Purity of Sample Used in this Work**

| Compound                 | CAS        | Source        | Purity given by supplier | Final purity <sup>a</sup> |
|--------------------------|------------|---------------|--------------------------|---------------------------|
| 2-aminoethanol           | 141-43-5   | Aldrich       | 0.995                    | 0.9998                    |
| DL-1-amino-2-propanol    | 7896-6     | Alfa Aesar    | 0.93                     | 0.9811                    |
| DL-2-amino-1-propanol    | 6168-72-5  | TCI           | 0.98                     | 0.9956                    |
| DL-2-amino-1-butanol     | 13054-87-0 | TCI           | 0.98                     | 0.9955                    |
| 2-amino-1-pentanol       | 22724-81-8 | Sigma-Aldrich | 0.97                     | 0.9896                    |
| 2-amino-1-hexanol        | 80696-28-2 | Sigma-Aldrich | 0.97                     | 0.9866                    |
| 2-(dimethylamino)ethanol | 108-01-0   | Aldrich       | 0.995                    | 0.9997                    |
| 2-methoxyethylamine      | 109-85-3   | Aldrich       | 0.99                     | 0.9989                    |

<sup>a</sup> Mass fraction impurity determined by the gas chromatography before sample use.

**Table S3. Frequencies  $\tilde{\nu}$  at 298 K in  $\text{cm}^{-1}$**

| compound                     |                         | $\nu(\text{OH-N})$ | $\nu(\text{NH-O})$ | (OH free) | Ref       |
|------------------------------|-------------------------|--------------------|--------------------|-----------|-----------|
| 2-amino-ethanol              | $\text{C}_2\text{Cl}_4$ | 3526               | 3618               | 3641      | this work |
|                              | $\text{C}_2\text{Cl}_4$ | 3526               |                    | 3640      | 1         |
|                              | $\text{CCl}_4$          | 3509               |                    | 3610      | 9         |
|                              | $\text{CCl}_4$          | 3513               |                    | 3634      | 9         |
|                              | $\text{CCl}_4$          | 3300               |                    | 3600      | 9         |
|                              | $\text{CCl}_4$          | 3230               |                    | 3570      | 9         |
|                              | $\text{CCl}_4$          | 3517               | 3620               | 3640      | 10        |
|                              | gas                     | 3555               |                    | 3666      | 11        |
|                              | gas                     | 3557               |                    | 3665      | 12        |
|                              | gas                     | 3549               |                    |           | 13        |
| gas                          | 3570                    |                    |                    | 14        |           |
| 1-amino-2-propanol           | $\text{C}_2\text{Cl}_4$ | 3511               | 3613               | 3631      | this work |
|                              | gas                     | 3544               |                    | 3667      | 12        |
|                              | gas                     | 3556               |                    | 3653      | 15        |
| 2-(dimethyl-amino)-1-ethanol | $\text{C}_2\text{Cl}_4$ | 3507               | -                  | 3637      | this work |
|                              | $\text{C}_2\text{Cl}_4$ | 3506               |                    | 3638      | 1         |
|                              | $\text{C}_2\text{Cl}_4$ | 3510               |                    | 3640      | 8         |
|                              | $\text{CCl}_4$          | 3500               |                    | 3638      | 10        |
|                              | gas                     | 3540               |                    | 3654      | 12        |
|                              | gas                     | 3534               |                    | 3656      | 12        |
| 2-(diethyl-amino)-1-ethanol  | $\text{C}_2\text{Cl}_4$ | 3472               |                    | 3630      | 1         |
|                              | $\text{CCl}_4$          | 3470               |                    | 3640      | 16        |
|                              | gas                     | 3515               |                    | 3660      | 12        |

### aminoethanol

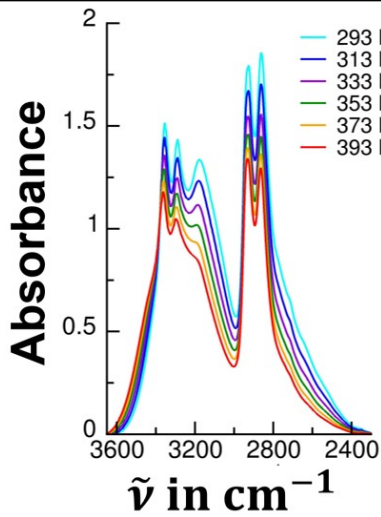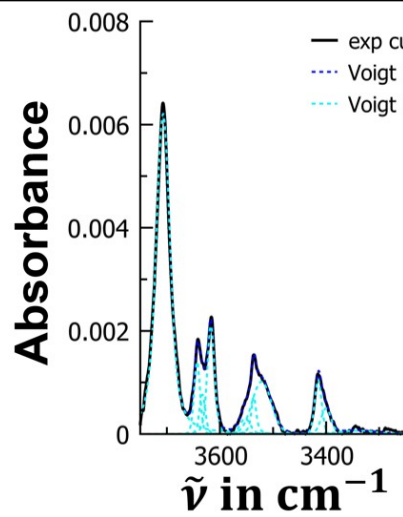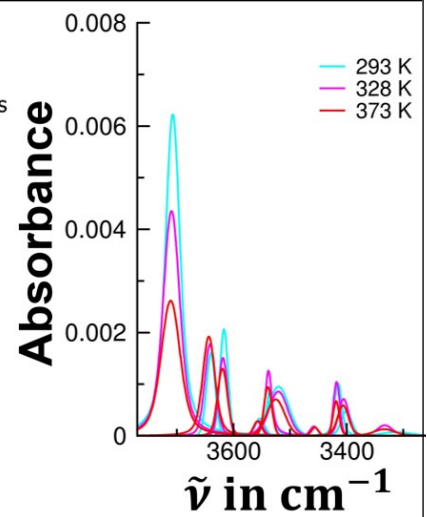

### 2-(dimethyl-amino)-1-ethanol

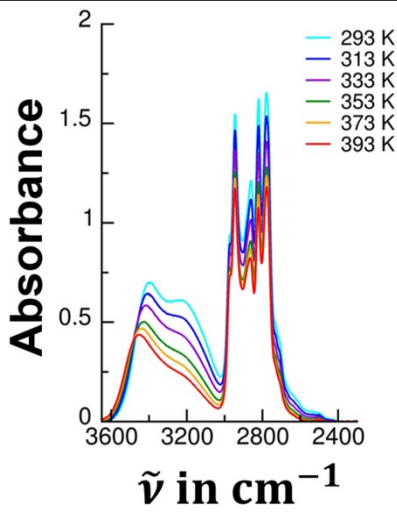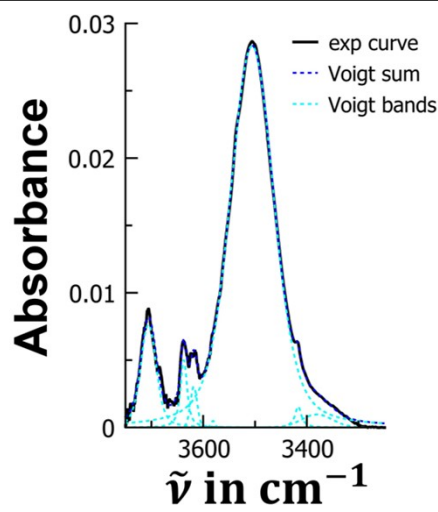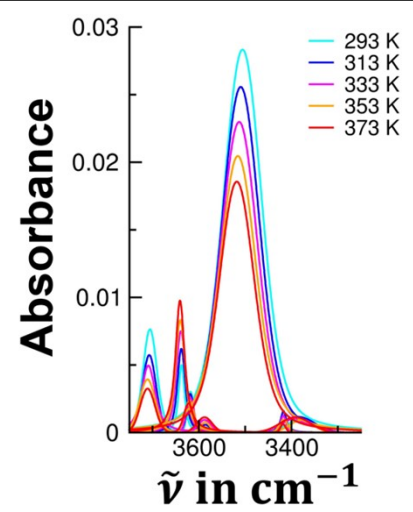

### methoxyethylamine

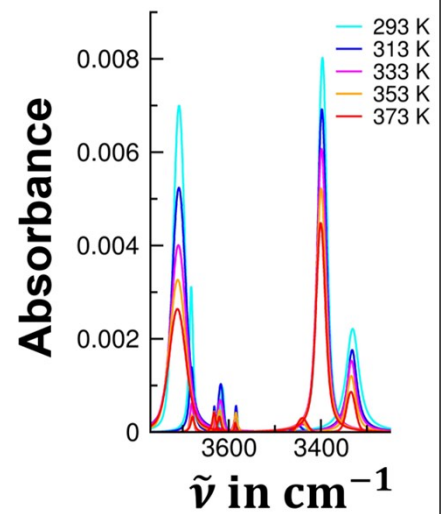

**Figure S1.** FTIR-spectra of 2-aminoethanol, 2-(dimethyl-amino)-1-ethanol and methoxyethylamine: The left spectrum shows pure compound at different temperatures. The middle spectrum shows the formation of integrals with the Voigtinator software at 293 K for 0.1 mole percent aminoalcohol in C<sub>2</sub>Cl<sub>4</sub>. In the right spectrum, the temperature dependency of integrals for diluted aminoalcohol is shown.

For 2-aminoethanol, the peak in the region of  $\tilde{\nu} = 3516 \text{ cm}^{-1}$  to  $\tilde{\nu} = 3556 \text{ cm}^{-1}$  appears to be deformed. It looks like there are at least two vibrations in that range. Therefore, monomer+water frequencies were calculated in addition to the monomer frequencies. The trans-aminoethanol-water cluster has a frequency in this region, which is the hydroxyl stretching frequency at  $\tilde{\nu} = 3539 \text{ cm}^{-1}$ . Therefore, the peak of the OHN-conformer in the region of  $\tilde{\nu} = 3516 \text{ cm}^{-1}$  to  $\tilde{\nu} = 3556 \text{ cm}^{-1}$  is interrupted by the peak at  $\tilde{\nu} = 3537 \text{ cm}^{-1}$  of the trans-conformer-water cluster. For the Van 't Hoff plot only the integral values of the OHN-conformer were used.

**Table S4.**

**Anharmonic Transition Energies ( $E$ )<sup>a</sup> in  $\text{cm}^{-1}$  and Dipole Strengths ( $DS$ )<sup>b</sup> in  $10^{-40} \text{ esu}^2 \text{ cm}^2$**

| compound                 | $E$ (OH $\cdots$ N) | $DS$ (OH $\cdots$ N) | $E$ (NH $\cdots$ O) | $DS$ (NH $\cdots$ O) | $E$ (trans) | $DS$ (trans) |
|--------------------------|---------------------|----------------------|---------------------|----------------------|-------------|--------------|
| 2-aminoethanol           | 3527.663            | 58.89536842          | 3673.485            | 19.83477033          | 3670.504    | 17.81696592  |
| 2-amino-1-propanol       | 3516.347            | 64.32903830          | 3660.531            | 20.35727926          | 3668.066    | 10.54279919  |
| 2-amino-1-butanol        | 3509.883            | 64.37772106          | 3670.235            | 20.35031719          | 3660.951    | 8.54717878   |
| 2-amino-1-pentanol       | 3509.729            | 66.07242596          | 3660.941            | 20.77768470          | 3663.813    | 18.16773210  |
| 2-amino-1-hexanol        | 3507.185            | 63.79430531          | 3651.138            | 20.52543937          | 3662.034    | 12.58891279  |
| 1-amino-2-propanol       | 3507.864            | 74.21218493          | 3609.555            | 8.29987577           | 3618.757    | 8.37661206   |
| 2-(dimethylamino)ethanol | 3522.051            | 65.95985315          | ---                 | ---                  | 3669.469    | 18.10825200  |

<sup>a</sup> Anharmonic transition energies ( $E$ ) are equal to vibration frequencies

<sup>b</sup> Dipole strengths ( $DS$ ) are used to correct integral values for Van't Hoff plots.

**Table S5. Equilibrium Constants  $K_{eq}$  for Van't Hoff Plots**

| $T$ in K | AE <sup>a</sup> | AE <sup>b</sup> | 2AP <sup>a</sup> | 2AP <sup>b</sup> | 2AB <sup>a</sup> | 2AB <sup>b</sup> | 2APe <sup>a</sup> | 2APe <sup>b</sup> | 2AH <sup>a</sup> | 2AH <sup>b</sup> | A2P <sup>a</sup> | A2P <sup>b</sup> | DMAE <sup>a</sup> |
|----------|-----------------|-----------------|------------------|------------------|------------------|------------------|-------------------|-------------------|------------------|------------------|------------------|------------------|-------------------|
| 293      | 0.48            | 1.08            | 0.41             | 0.21             | 0.44             | 0.086            | 1.06              | 0.25              | 0.79             | 0.187            | 0.95             | 0.40             |                   |
| 298      | 0.35            | 0.79            | 0.41             | 0.17             | 0.42             | 0.091            | 0.95              | 0.37              | 0.75             | 0.194            | 0.82             | 0.36             |                   |
| 303      | 0.37            | 0.67            | 0.39             | 0.16             | 0.40             | 0.089            | 0.88              | ---               | 0.75             | 0.147            | 0.68             | 0.32             |                   |
| 308      | 0.34            | 0.55            | 0.32             | 0.17             | 0.39             | 0.084            | 0.76              | 0.23              | 0.67             | 0.141            | 0.58             | 0.29             |                   |
| 313      | 0.31            | 0.68            | 0.33             | 0.14             | 0.36             | 0.081            | 0.75              | 0.24              | 0.65             | 0.161            | 0.56             | 0.29             |                   |
| 318      | 0.38            | 1.03            | ---              | ---              | 0.36             | 0.088            | ---               | ---               | ---              | ---              | 0.49             | 0.27             | 3.84              |
| 323      | 0.36            | 0.69            | 0.29             | 0.16             | 0.33             | 0.081            | 0.72              | 0.23              | 0.62             | 0.133            | 0.60             | 0.36             | -                 |
| 324      | ---             | ---             | ---              | ---              | 0.34             | ---              | ---               | ---               | ---              | ---              | ---              | ---              | 3.49              |
| 328      | 0.28            | 0.58            | ---              | ---              | 0.31             | 0.077            | ---               | ---               | ---              | ---              | 0.62             | 0.40             | ---               |
| 329      | ---             | ---             | ---              | ---              | ---              | ---              | ---               | ---               | ---              | ---              | ---              | ---              | 3.21              |
| 333      | 0.38            | 0.79            | 0.27             | 0.17             | 0.31             | 0.072            | 0.70              | 0.21              | 0.50             | 0.110            | 0.46             | 0.32             | 2.98              |
| 338      | 0.32            | 0.65            | ---              | ---              | 0.27             | 0.067            | ---               | ---               | ---              | ---              | 0.37             | 0.27             | 2.67              |
| 343      | ---             | ---             | 0.26             | 0.12             | 0.26             | 0.063            | 0.60              | 0.20              | 0.47             | 0.112            | 0.34             | 0.26             | 2.46              |
| 344      | 0.22            | 0.38            | ---              | ---              | ---              | ---              | ---               | ---               | ---              | ---              | ---              | ---              | ---               |
| 348      | 0.22            | 0.51            | ---              | ---              | ---              | ---              | ---               | ---               | ---              | ---              | 0.33             | 0.26             | ---               |
| 349      | ---             | ---             | ---              | ---              | 0.25             | 0.060            | ---               | ---               | ---              | ---              | ---              | ---              | 2.38              |
| 353      | 0.19            | 0.36            | 0.23             | 0.11             | ---              | ---              | 0.56              | 0.20              | 0.45             | 0.128            | 0.34             | 0.30             | ---               |
| 354      | ---             | ---             | ---              | ---              | 0.22             | 0.068            | ---               | ---               | ---              | ---              | ---              | ---              | 2.37              |
| 360      | 0.19            | 0.52            | ---              | ---              | 0.21             | 0.055            | ---               | ---               | ---              | ---              | 0.31             | 0.28             | 1.90              |
| 366      | 0.17            | 0.44            | ---              | ---              | 0.19             | 0.049            | ---               | ---               | ---              | ---              | 0.25             | 0.26             | 1.81              |
| 373      | 0.16            | 0.44            | ---              | ---              | 0.19             | 0.057            | ---               | ---               | ---              | ---              | 0.24             | 0.25             | 1.65              |

Abbreviations for Aminoalcohols: AE (2-aminoethanol), 2AP (2-amino-1-propanol), 2AB (2-amino-1-butanol), 2APe (2-amino-1-pentanol), 2AH (2-amino-1-hexanol), A2P (1-amino-2-propanol), DMAE (2-(dimethyl-amino)-1-ethanol)

<sup>a</sup> OH-N hydrogen bond

<sup>b</sup> NH-O hydrogen bond

**Table S6a. The G4 Calculated Gas Phase Standard Molar Enthalpies of Formation of Aminoalcohols Stable Conformers at  $p^\circ=0.1$  MPa and  $T=298$  K (in  $\text{kJ}\cdot\text{mol}^{-1}$ )<sup>a</sup>**

| compound                     | $\Delta_f H_m^\circ(\text{g})_{\text{OH-}}$<br>N <sup>a</sup> | $\Delta_f H_m^\circ(\text{g})_{\text{NH-}}$<br>O <sup>b</sup> | $\Delta_f H_m^\circ(\text{g})_{\text{trans}}$<br>c | $\Delta_f H_m^\circ(\text{g})_{\text{cis}}$<br>d | $\Sigma$ increments <sup>c</sup> |        |
|------------------------------|---------------------------------------------------------------|---------------------------------------------------------------|----------------------------------------------------|--------------------------------------------------|----------------------------------|--------|
|                              | 1                                                             | 2                                                             | 3                                                  | 4                                                | 5                                | 6      |
| 2-amino-ethanol              |                                                               | -207.4                                                        | -201.7                                             | -195.7                                           | -189.3                           | -200.7 |
| 2-amino-1-propanol           |                                                               | -242.7                                                        | -237.9                                             | -231.3                                           | -222.5                           | -235.6 |
| 2-amino-1-butanol            |                                                               | -263.1                                                        | -257.9                                             | -251.7                                           | -242.6                           | -257.1 |
| 2-amino-1-pentanol           |                                                               | -284.3                                                        | -279.3                                             | -272.8                                           | -263.7                           | -278.5 |
| 2-amino-1-hexanol            |                                                               | -305.9                                                        | -300.9                                             | -294.5                                           | -285.2                           | -300.0 |
| 1-amino-2-propanol           |                                                               | -248.4                                                        | -239.7                                             | -235.6                                           | -227.1                           | -238.2 |
| 1-amino-2-butanol            |                                                               | -269.8                                                        | -258.3                                             | -256.0                                           | -248.0                           | -259.7 |
| 2-(dimethyl-amino)-1-ethanol |                                                               | -209.7                                                        | -                                                  | -195.8                                           | -192.4                           | -201.0 |
| 2-(diethyl-amino)-1-ethanol  |                                                               | -254.8                                                        | -                                                  | -241.1                                           | -237.3                           | -254.7 |

<sup>a</sup> Calculated by the G4 method according to the standard atomization procedure. The expanded uncertainty assessed to be  $\pm 3.5 \text{ kJ}\cdot\text{mol}^{-1}$ .<sup>17</sup>

<sup>b</sup> Calculated

**Table S6b. Raw Enthalpy  $H_{298}$  Data in Hartree from G4 Calculations for Different Conformers**

| Compound             | Conformation <sup>a</sup> |               |             |             |
|----------------------|---------------------------|---------------|-------------|-------------|
|                      | Intra HB OH-N             | Intra HB NH-O | trans       | cis         |
| 2-aminoethanol       | -210.252120               | -210.249953   | -210.247670 | -210.245211 |
| 2-amino-1-propanol   | -249.534367               | -249.533260   | -249.531670 | -249.526679 |
| 2-amino-1-butanol    | -288.810989               | -288.809001   | -288.806638 | -288.803177 |
| 2-amino-1-pentanol   | -328.087900               | -328.085969   | -328.083519 | -328.080019 |
| 2-amino-1-hexanol    | -367.364946               | -367.363030   | -367.360582 | -367.357072 |
| 1-amino-2-propanol   | -249.536567               | -249.532553   | -249.531040 | -249.528440 |
| 1-amino-2-butanol    | -288.813529               | -288.809149   | -288.808270 | -288.805225 |
| dimethylaminoethanol | -288.790632               | ---           | -288.785338 | -288.784048 |
| diethylaminoethanol  | -367.345461               | ---           | -367.340259 | -367.338827 |

<sup>a</sup>For definition see Fig. S2

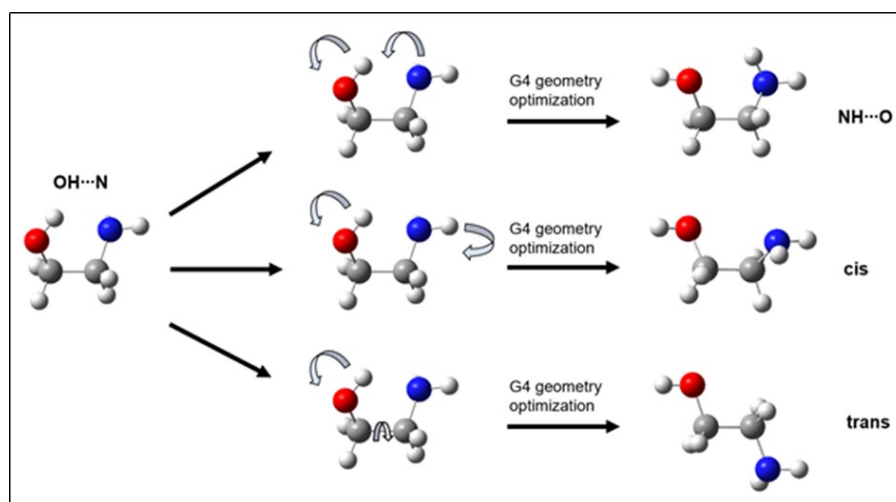

**Figure S2.** Definition of 2-amino-ethanol conformers discussed in this work

**Table S6c. Comparison of Measures of the *Intra*-HB Strength in Aminoalcohols at  $p^{\circ}=0.1$  MPa and  $T=298$  K (in  $\text{kJ}\cdot\text{mol}^{-1}$ )**

| Compound (type of bond)                      | $\Delta H_{HB}^a$ | $H_S^b$ | $\Delta_f H_m^o(g)_{QC}^c$ |
|----------------------------------------------|-------------------|---------|----------------------------|
| 2-amino-ethanol (OH $\cdots$ N)              | -11.1 $\pm$ 3.0   | -6.2    | -11.7                      |
| 2-amino-ethanol (NH $\cdots$ O)              | -8.9 $\pm$ 4.1    |         | -6.0                       |
| 2-amino-1-propanol (OH $\cdots$ N)           | -8.4 $\pm$ 1.5    | -7.1    | -11.4                      |
| 2-amino-1-propanol (NH $\cdots$ O)           | -6.8 $\pm$ 3.3    |         | -6.6                       |
| 2-amino-1-butanol (OH $\cdots$ N)            | -10.1 $\pm$ 0.8   | -6.0    | -11.4                      |
| 2-amino-1-butanol (NH $\cdots$ O)            | -6.6 $\pm$ 1.4    |         | -6.2                       |
| 2-amino-1-pentanol (OH $\cdots$ N)           | -8.3 $\pm$ 1.6    | -5.8    | -11.5                      |
| 2-amino-1-pentanol (NH $\cdots$ O)           | -5.9 $\pm$ 4.1    |         | -6.5                       |
| 2-amino-1-hexanol (OH $\cdots$ N)            | -8.8 $\pm$ 1.2    | -5.9    | -11.4                      |
| 2-amino-1-hexanol (NH $\cdots$ O)            | -7.1 $\pm$ 3.3    |         | -6.4                       |
| 1-amino-2-propanol (OH $\cdots$ N)           | -14.7 $\pm$ 2.2   | -9.9    | -12.8                      |
| 1-amino-2-propanol (NH $\cdots$ O)           | -3.7 $\pm$ 2.2    |         | -4.1                       |
| 1-amino-2-butanol (OH $\cdots$ N)            | -                 | -10.1   | -13.8                      |
| 1-amino-2-butanol (NH $\cdots$ O)            | -                 |         | -2.3                       |
| 2-(dimethyl-amino)-1-ethanol (OH $\cdots$ N) | -15.1 $\pm$ 1.2   | -6.6    | -13.9                      |
| 2-(diethyl-amino)-1-ethanol (OH $\cdots$ N)  | -                 | -3.5    | -13.7                      |

<sup>a</sup> Spectroscopic measure of the *intra*-HB strength from Table 2.

<sup>b</sup> The strain enthalpies  $H_S = \Delta_f H_m^o(g)_{\text{exp}} - \Sigma(\text{increments})$  of the amino alcohols (see main text) without correction for strain.

<sup>c</sup> Quantum-chemical measure of the true *intra*-HB strength, calculated as the differences  $[\Delta_f H_m^o(g)_{\text{OH}\cdots\text{N}} - \Delta_f H_m^o(g)_{\text{trans}}]$  and  $[\Delta_f H_m^o(g)_{\text{NH}\cdots\text{O}} - \Delta_f H_m^o(g)_{\text{trans}}]$  from G4-values collected in Table S6a with the expanded uncertainty taken as  $\pm 3.5$   $\text{kJ}\cdot\text{mol}^{-1}$ .

**Table S7. Compilation of the Standard Molar Enthalpies of Vaporization  $\Delta_l^q H_m^o$  of Amino-Alcohols and Gaseous Standard Molar Enthalpies of Formation  $\Delta_f H_m^o(g)$  at 298 K (in  $\text{kJ}\cdot\text{mol}^{-1}$ )**

| Compound                              | $\Delta_l^q H_m^o$ <sup>18,19</sup> | $\Delta_f H_m^o(g)$               |
|---------------------------------------|-------------------------------------|-----------------------------------|
| 1-amino-2-propanol [78-96-6]          | 59.3 $\pm$ 0.4 (this work)          | -248.1 $\pm$ 2.1 <sup>18,19</sup> |
| 1-amino-2-butanol [13552-21-1]        | 64.9 $\pm$ 0.3                      | -269.8 <sup>a</sup>               |
| 1-amino-2-pentanol [5343-35-1]        | 69.1 $\pm$ 0.7                      |                                   |
| 1-amino-2-hexanol [72799-62-3]        | 73.8 $\pm$ 1.0                      |                                   |
| 2-amino-ethanol [141-43-5]            | 59.2 $\pm$ 0.4                      | -206.9 $\pm$ 1.3 <sup>18,19</sup> |
| 2-amino-1-propanol [6168-72-5]        | 59.7 $\pm$ 0.6                      | -242.7 <sup>a</sup>               |
| 2-amino-1-butanol [96-20-8]           | 64.5 $\pm$ 0.4 (this work)          | -263.1 <sup>a</sup>               |
| 2-amino-1-pentanol [16369-14-5]       | 68.3 $\pm$ 0.7                      | -284.8 <sup>a</sup>               |
| 2-amino-1-hexanol [5665-74-7]         | 73.2 $\pm$ 0.7                      | -305.9 <sup>a</sup>               |
| 2-(dimethyl-amino)-ethanol [108-01-0] | 47.1 $\pm$ 0.1 <sup>18,19</sup>     | -207.6 $\pm$ 1.7 <sup>18,19</sup> |
| 2-(diethyl-amino)-ethanol [100-37-8]  | 52.6 $\pm$ 0.2 <sup>18,19</sup>     | -258.2 $\pm$ 1.2 <sup>18,19</sup> |

<sup>a</sup> The most stable conformer from Table S6a

**Table S8. Group-Additivity Values  $\Gamma_i$  for Calculation of Enthalpies of Vaporization,  $\Delta_l^g H_m^o(298\text{ K})$  and Enthalpies of Formation,  $\Delta_f H_m^o(\text{g}, 298\text{ K})$ , of Alkanes, Amines, and Amino-Alcohols (in  $\text{kJ mol}^{-1}$ )<sup>20-22</sup>**

| Groups <sup>a</sup>                 | $\Delta_l^g H_m^o(298\text{ K})$<br>$\Gamma_i$ | $\Delta_f H_m^o(\text{g}, 298\text{ K})$<br>$\Gamma_i$ |
|-------------------------------------|------------------------------------------------|--------------------------------------------------------|
| <b>Alkanes</b>                      |                                                |                                                        |
| C-(C)(H) <sub>3</sub>               | 6.33                                           | -42.05                                                 |
| C-(C) <sub>2</sub> (H) <sub>2</sub> | 4.52                                           | -21.46                                                 |
| C-(C) <sub>3</sub> (H)              | 1.24                                           | -9.04                                                  |
| C-(C) <sub>4</sub>                  | -2.69                                          | -1.26                                                  |
| <b>Amines</b>                       |                                                |                                                        |
| C-(N)(H) <sub>3</sub>               | 6.33                                           | -42.05                                                 |
| C-(N)(C)(H) <sub>2</sub>            | 2.9                                            | -26.9                                                  |
| C-(N)(C) <sub>2</sub> (H)           | -2.0                                           | -20.0                                                  |
| C-(N)(C) <sub>3</sub>               | -7.7                                           | -16.1                                                  |
| N-(C)(H) <sub>2</sub>               | 18.0                                           | 19.4                                                   |
| N-(C) <sub>2</sub> (H)              | 12.6                                           | 62.2                                                   |
| N-(C) <sub>3</sub>                  | 4.9                                            | 103.2                                                  |
| N-(Cb)(C)(H)                        | 10.9                                           | 65.4                                                   |
| Cb-(N)                              | 9.5                                            | 2.1                                                    |
| <b>Alcohols</b>                     |                                                |                                                        |
| C-(O)(H) <sub>3</sub>               | 6.33                                           | -42.05                                                 |
| C-(O)(C)(H) <sub>2</sub>            | 4.7                                            | -33.7                                                  |
| C-(O)(C) <sub>2</sub> (H)           | 1.3                                            | -29.2                                                  |
| C-(O)(C) <sub>3</sub>               | -3.8                                           | -26.9                                                  |
| HO-(C)                              | 31.5                                           | -159.45                                                |



## Static method: vapor pressure measurements

The vapor pressures of 1-amino-2-propanol in the temperature range 327-373 K were measured with the static method by using the self-made experimental setup.<sup>23</sup> The stainless still cylindrical cell with the sample was kept at a constant temperature within  $\pm 0.02$  K. The sample cell was connected to the high temperature capacitance manometers covering the working range of (0.1 to  $10^5$ ) Pa. Uncertainties of 0.5 % for the pressure readings for both manometers were stated by the manufacturer. The temperature of tubing connections between the measuring cell and pressure gauges was kept higher by 30-50 K than those in the sample cell in order to avoid condensation of sample vapors in the tubing system. The uncertainty of absolute temperature determination was  $\pm 0.05$  K over the working temperature interval of the system of (291 – 345) K. The detailed description of the experimental apparatus, procedure, and uncertainty analysis, is given elsewhere.<sup>23</sup>

**Table S9. Absolute Vapor Pressures  $p$ , Standard ( $p^o = 0.1$  MPa) Molar Vaporization Enthalpies,  $\Delta_l^g H_m^o$ , and Standard ( $p^o = 0.1$  MPa) Molar Vaporization Entropies,  $\Delta_l^g S_m^o$  Obtained by the Static Method**

| $T/$<br>K                                                                                                        | $p/$<br>Pa | $u(p)^a /$<br>Pa | $\Delta_l^g H_m^o(T)_b /$<br>kJ·mol <sup>-1</sup> | $\Delta_l^g S_m^o(T) /$<br>J·K <sup>-1</sup> ·mol <sup>-1</sup> |
|------------------------------------------------------------------------------------------------------------------|------------|------------------|---------------------------------------------------|-----------------------------------------------------------------|
| 1-amino-2-propanol [78-96-6] $\Delta_l^g H_m^o(298 \text{ K}) = (59.3 \pm 0.4) \text{ kJ} \cdot \text{mol}^{-1}$ |            |                  |                                                   |                                                                 |
| $\ln(p/p_0) = \frac{300.5}{R} - \frac{78270.5}{RT} - \frac{63.5}{R} \ln \frac{T}{298.15}; p_0 = 1 \text{ Pa}$    |            |                  |                                                   |                                                                 |
| 326.82                                                                                                           | 759        | -4               | 57.5                                              | 135.4                                                           |
| 326.96                                                                                                           | 769        | -1               | 57.5                                              | 135.4                                                           |
| 327.03                                                                                                           | 769        | -4               | 57.5                                              | 135.4                                                           |
| 327.09                                                                                                           | 776        | 0                | 57.5                                              | 135.4                                                           |
| 327.18                                                                                                           | 777        | -4               | 57.5                                              | 135.3                                                           |
| 327.40                                                                                                           | 786        | -6               | 57.5                                              | 135.3                                                           |
| 327.57                                                                                                           | 798        | -3               | 57.5                                              | 135.3                                                           |
| 327.68                                                                                                           | 805        | -1               | 57.5                                              | 135.3                                                           |
| 327.77                                                                                                           | 801        | -10              | 57.5                                              | 135.2                                                           |
| 327.96                                                                                                           | 819        | -2               | 57.4                                              | 135.2                                                           |
| 328.71                                                                                                           | 867        | 6                | 57.4                                              | 135.1                                                           |
| 328.90                                                                                                           | 882        | 10               | 57.4                                              | 135.1                                                           |
| 329.02                                                                                                           | 885        | 6                | 57.4                                              | 135.1                                                           |
| 329.08                                                                                                           | 890        | 8                | 57.4                                              | 135.1                                                           |
| 329.69                                                                                                           | 920        | 3                | 57.3                                              | 134.9                                                           |
| 329.82                                                                                                           | 922        | -2               | 57.3                                              | 134.8                                                           |
| 330.07                                                                                                           | 940        | 1                | 57.3                                              | 134.8                                                           |
| 330.24                                                                                                           | 946        | -3               | 57.3                                              | 134.8                                                           |
| 330.52                                                                                                           | 967        | 1                | 57.3                                              | 134.7                                                           |
| 330.55                                                                                                           | 967        | -1               | 57.3                                              | 134.7                                                           |
| 330.96                                                                                                           | 988        | -5               | 57.3                                              | 134.6                                                           |
| 331.12                                                                                                           | 1014       | 11               | 57.2                                              | 134.7                                                           |
| 331.16                                                                                                           | 1002       | -4               | 57.2                                              | 134.6                                                           |
| 332.07                                                                                                           | 1053       | -12              | 57.2                                              | 134.3                                                           |
| 332.18                                                                                                           | 1068       | -4               | 57.2                                              | 134.4                                                           |
| 332.44                                                                                                           | 1095       | 5                | 57.2                                              | 134.4                                                           |
| 332.61                                                                                                           | 1103       | 2                | 57.1                                              | 134.3                                                           |

|        |      |     |      |       |
|--------|------|-----|------|-------|
| 332.93 | 1125 | 2   | 57.1 | 134.3 |
| 333.00 | 1118 | -10 | 57.1 | 134.2 |
| 333.50 | 1172 | 8   | 57.1 | 134.2 |
| 333.58 | 1176 | 7   | 57.1 | 134.2 |
| 333.62 | 1170 | -2  | 57.1 | 134.1 |
| 333.74 | 1179 | -2  | 57.1 | 134.1 |
| 334.94 | 1277 | 6   | 57.0 | 133.9 |
| 335.02 | 1277 | 0   | 57.0 | 133.9 |
| 335.74 | 1341 | 6   | 57.0 | 133.8 |
| 335.89 | 1346 | -1  | 56.9 | 133.7 |
| 335.95 | 1346 | -6  | 56.9 | 133.7 |
| 336.02 | 1359 | 1   | 56.9 | 133.7 |
| 336.03 | 1355 | -3  | 56.9 | 133.7 |
| 336.93 | 1438 | 4   | 56.9 | 133.5 |
| 337.30 | 1465 | -2  | 56.9 | 133.4 |
| 338.32 | 1569 | 10  | 56.8 | 133.3 |
| 339.39 | 1669 | 8   | 56.7 | 133.1 |
| 339.65 | 1693 | 6   | 56.7 | 133.0 |
| 339.76 | 1702 | 4   | 56.7 | 133.0 |
| 340.51 | 1767 | -8  | 56.6 | 132.8 |
| 340.60 | 1769 | -15 | 56.6 | 132.8 |
| 340.73 | 1799 | 1   | 56.6 | 132.8 |
| 341.60 | 1895 | 3   | 56.6 | 132.7 |
| 343.07 | 2083 | 23  | 56.5 | 132.5 |
| 344.12 | 2187 | -2  | 56.4 | 132.2 |
| 344.37 | 2231 | 11  | 56.4 | 132.2 |
| 344.44 | 2229 | 0   | 56.4 | 132.1 |
| 345.07 | 2337 | 26  | 56.4 | 132.1 |
| 345.18 | 2338 | 13  | 56.4 | 132.0 |
| 345.20 | 2349 | 21  | 56.4 | 132.1 |
| 345.42 | 2349 | -8  | 56.3 | 131.9 |
| 349.74 | 3000 | -2  | 56.1 | 131.1 |
| 351.74 | 3340 | -9  | 55.9 | 130.8 |
| 351.84 | 3362 | -5  | 55.9 | 130.8 |
| 352.14 | 3419 | -3  | 55.9 | 130.7 |
| 352.37 | 3459 | -6  | 55.9 | 130.7 |
| 352.48 | 3509 | 23  | 55.9 | 130.7 |
| 352.55 | 3509 | 10  | 55.9 | 130.7 |
| 352.74 | 3518 | -17 | 55.9 | 130.6 |
| 352.92 | 3562 | -8  | 55.9 | 130.6 |
| 353.19 | 3626 | 4   | 55.8 | 130.5 |
| 353.25 | 3622 | -12 | 55.8 | 130.5 |
| 353.30 | 3644 | 0   | 55.8 | 130.5 |
| 353.38 | 3650 | -9  | 55.8 | 130.5 |
| 354.46 | 3871 | -6  | 55.8 | 130.3 |
| 354.80 | 3940 | -8  | 55.7 | 130.2 |
| 355.02 | 3999 | 4   | 55.7 | 130.2 |

|        |      |     |      |       |
|--------|------|-----|------|-------|
| 355.04 | 3995 | -4  | 55.7 | 130.2 |
| 355.15 | 4017 | -5  | 55.7 | 130.2 |
| 355.35 | 4058 | -7  | 55.7 | 130.1 |
| 355.38 | 4066 | -6  | 55.7 | 130.1 |
| 355.43 | 4074 | -9  | 55.7 | 130.1 |
| 356.03 | 4200 | -14 | 55.7 | 130.0 |
| 356.19 | 4231 | -19 | 55.7 | 129.9 |
| 356.69 | 4349 | -15 | 55.6 | 129.9 |
| 356.78 | 4372 | -12 | 55.6 | 129.9 |
| 356.84 | 4406 | 8   | 55.6 | 129.9 |
| 357.28 | 4474 | -27 | 55.6 | 129.7 |
| 357.45 | 4541 | 0   | 55.6 | 129.8 |
| 357.69 | 4578 | -20 | 55.6 | 129.7 |
| 357.70 | 4609 | 8   | 55.6 | 129.7 |
| 357.82 | 4638 | 8   | 55.5 | 129.7 |
| 357.92 | 4661 | 7   | 55.5 | 129.7 |
| 358.35 | 4737 | -22 | 55.5 | 129.6 |
| 358.44 | 4768 | -14 | 55.5 | 129.6 |
| 359.21 | 4971 | -5  | 55.5 | 129.4 |
| 360.15 | 5235 | 12  | 55.4 | 129.3 |
| 360.21 | 5221 | -18 | 55.4 | 129.2 |
| 360.54 | 5368 | 39  | 55.4 | 129.3 |
| 360.62 | 5373 | 22  | 55.4 | 129.2 |
| 360.94 | 5431 | -8  | 55.4 | 129.1 |
| 361.01 | 5465 | 7   | 55.3 | 129.1 |
| 361.09 | 5472 | -9  | 55.3 | 129.1 |
| 362.09 | 5740 | -27 | 55.3 | 128.9 |
| 363.59 | 6275 | 55  | 55.2 | 128.8 |
| 363.95 | 6340 | 6   | 55.2 | 128.6 |
| 364.98 | 6658 | -10 | 55.1 | 128.4 |
| 365.74 | 6927 | 3   | 55.0 | 128.3 |
| 365.77 | 6907 | -27 | 55.0 | 128.3 |
| 366.85 | 7286 | -28 | 55.0 | 128.1 |
| 368.25 | 7871 | 39  | 54.9 | 127.9 |
| 368.65 | 7984 | -2  | 54.9 | 127.8 |
| 369.62 | 8343 | -26 | 54.8 | 127.6 |
| 370.51 | 8742 | 7   | 54.7 | 127.5 |
| 370.54 | 8787 | 39  | 54.7 | 127.5 |
| 371.08 | 8981 | 4   | 54.7 | 127.4 |
| 372.92 | 9820 | 23  | 54.6 | 127.1 |
| 372.93 | 9805 | 3   | 54.6 | 127.1 |

<sup>a</sup> Experimental temperature measured with the standard uncertainty ( $u(T) = 0.1$  K).

<sup>b</sup> Standard uncertainties of experimental vapor pressures were calculated according to the following equations:  $u(p/\text{Pa}) = 0.05 + 0.010(p/\text{Pa})$

<sup>c</sup> Uncertainty of the vaporization enthalpy  $U(\Delta_l^g H_m^o)$  is the expanded uncertainty (0.95 level of confidence). They were calculated according to a procedure described elsewhere.<sup>24,25</sup> Uncertainties include uncertainties from the experimental conditions and the fitting equation, vapor pressures, and uncertainties from adjustment of vaporization/sublimation enthalpies to the reference temperature  $T = 298$  K.

## Transpiration method

Absolute vapor pressures were measured using the transpiration method.<sup>23-25</sup> The main idea of this method is to saturate the gas stream flowing over the sample and to determine the amount of compound transferred by the gas within a given time. Approximately 0.5 to 0.8 g of the sample is mixed with glass beads (diameter 1 mm) and placed in the thermostatted U-shaped saturator. The glass beads are needed to enlarge the contact area between gas and sample. A stream of nitrogen at a well-defined flow rate was passed through the saturator at constant temperature ( $\pm 0.1$  K), and the transported material was collected in a cold trap. The amount of the condensed substance was determined by GC. The saturation vapor pressure  $p_i$  at each temperature  $T_i$  was calculated from the amount of condensate collected within a definite period of time:

$$p_i = m_i \cdot R \cdot T_a / V \cdot M_i ; \quad V = (n_{N_2} + n_i) \cdot R \cdot T_a / P_a \quad (S1)$$

where  $V$  is the volume of the gas phase consisting of the  $n_{N_2}$  moles of the carrier gas and  $n_i$  mole of gaseous compound under study (with the molar mass  $M_i$ ) at the atmospheric pressure  $P_a$  and the ambient temperature  $T_a$ . The volume of the carrier gas  $V_{N_2}$  was determined by the digital flow rate sensor from integration with a microcontroller. We used the Honeywell S&C - HAFBLF0200C2AX5 digital flow rate sensor with uncertainty at the level of 2.5 %. The flow rate of the nitrogen stream was also controlled by using a soap bubble flow meter (HP soap film flowmeter (model 0101-0113)) and optimized in order to reach the saturation equilibrium of the transporting gas at each temperature under study. The volume of the carrier gas  $V_{N_2}$  was readied from the digital flow rate sensor. The amount of the compound under investigation  $n_i$  in the carrier gas was estimated at each temperature using the ideal gas law.

Before starting the vapor pressure measurements, the sample was first pre-conditioned at 310-320 K (within about one hour) in order to remove possible traces of water. The saturator was then kept at 310-315 K (to remove possible traces of volatile compounds). In order to assure the competition of pre-conditioning at the selected temperature, three samples were taken during the sample flashing at and analysed by the GC. A constant vapor pressure at this temperature indicated that the transpiration experiments could begin. GC analysis of the transported material did not reveal any additional contamination. The absence of impurities and decomposition products was re-checked by GC analysis of the saturator content at the end of the entire series of experiments.

**Table S10. Results of Transpiration Method: Absolute Vapor Pressures  $p$ , Standard ( $p^\circ = 0.1$  MPa) Molar Vaporization Enthalpy and Standard ( $p^\circ = 0.1$  MPa) Molar Vaporization Entropy**

| $T/$<br>K <sup>a</sup>                                                                                               | $m/$<br>mg <sup>b</sup> | $V(N_2)^c /$<br>dm <sup>3</sup> | $T_a/$<br>K <sup>d</sup> | Flow/<br>dm <sup>3</sup> ·h <sup>-1</sup> | $p/$<br>Pa <sup>e</sup> | $u(p)/$<br>Pa <sup>f</sup> | $\Delta_l^g H_m^\circ(T)$<br>kJ·mol <sup>-1</sup> | $\Delta_l^g S_m^\circ(T)$<br>J·K <sup>-1</sup> ·mol <sup>-1</sup> |
|----------------------------------------------------------------------------------------------------------------------|-------------------------|---------------------------------|--------------------------|-------------------------------------------|-------------------------|----------------------------|---------------------------------------------------|-------------------------------------------------------------------|
| 2-amino-1-butanol [96-20-8]: $\Delta_l^g H_m^\circ(298 \text{ K}) = (64.5 \pm 0.4) \text{ kJ} \cdot \text{mol}^{-1}$ |                         |                                 |                          |                                           |                         |                            |                                                   |                                                                   |
| $\ln(p/p_0) = \frac{314.4}{R} - \frac{85930.6}{RT} - \frac{71.8}{R} \ln \frac{T}{298.15} ; p_0 = 1 \text{ Pa}$       |                         |                                 |                          |                                           |                         |                            |                                                   |                                                                   |
| 278.3                                                                                                                | 1.83                    | 14.42                           | 294.9                    | 1.26                                      | 3.55                    | 0.09                       | 66.0                                              | 151.8                                                             |
| 280.7                                                                                                                | 1.09                    | 6.620                           | 294.9                    | 1.26                                      | 4.59                    | 0.12                       | 65.8                                              | 151.3                                                             |
| 283.3                                                                                                                | 3.02                    | 13.901                          | 294.9                    | 1.26                                      | 6.04                    | 0.18                       | 65.6                                              | 150.8                                                             |
| 283.7                                                                                                                | 1.09                    | 4.834                           | 294.9                    | 1.26                                      | 6.26                    | 0.18                       | 65.6                                              | 150.7                                                             |
| 286.8                                                                                                                | 1.11                    | 3.794                           | 294.9                    | 1.26                                      | 8.15                    | 0.23                       | 65.3                                              | 149.6                                                             |
| 289.7                                                                                                                | 1.09                    | 2.721                           | 294.9                    | 1.26                                      | 11.07                   | 0.30                       | 65.1                                              | 149.1                                                             |
| 292.7                                                                                                                | 1.11                    | 2.051                           | 294.9                    | 1.26                                      | 14.89                   | 0.40                       | 64.9                                              | 148.6                                                             |
| 295.4                                                                                                                | 0.94                    | 1.464                           | 294.9                    | 1.27                                      | 17.75                   | 0.47                       | 64.7                                              | 147.3                                                             |
| 298.5                                                                                                                | 0.94                    | 1.124                           | 294.9                    | 1.27                                      | 23.09                   | 0.60                       | 64.5                                              | 146.5                                                             |
| 302.5                                                                                                                | 1.04                    | 0.870                           | 294.9                    | 1.27                                      | 32.84                   | 0.85                       | 64.2                                              | 145.6                                                             |
| 303.5                                                                                                                | 0.42                    | 0.325                           | 294.9                    | 0.89                                      | 35.37                   | 0.91                       | 64.1                                              | 145.3                                                             |
| 303.5                                                                                                                | 1.68                    | 1.303                           | 294.9                    | 1.28                                      | 35.56                   | 0.91                       | 64.1                                              | 145.3                                                             |

|       |      |       |       |      |        |      |      |       |
|-------|------|-------|-------|------|--------|------|------|-------|
| 305.7 | 1.05 | 0.649 | 294.9 | 1.26 | 44.36  | 1.13 | 64.0 | 145.1 |
| 306.6 | 1.85 | 1.079 | 294.9 | 1.28 | 47.16  | 1.20 | 63.9 | 144.8 |
| 307.6 | 1.17 | 0.615 | 294.9 | 1.27 | 52.20  | 1.33 | 63.8 | 144.8 |
| 308.6 | 1.06 | 0.530 | 294.9 | 1.27 | 55.15  | 1.40 | 63.8 | 144.3 |
| 309.6 | 2.24 | 0.994 | 294.9 | 1.28 | 62.04  | 1.58 | 63.7 | 144.4 |
| 310.6 | 1.00 | 0.440 | 294.9 | 1.26 | 62.73  | 1.59 | 63.6 | 143.6 |
| 311.6 | 1.08 | 0.424 | 294.9 | 1.27 | 70.03  | 1.78 | 63.6 | 143.6 |
| 312.6 | 2.35 | 0.865 | 294.9 | 1.28 | 74.56  | 1.89 | 63.5 | 143.3 |
| 313.7 | 1.04 | 0.345 | 294.9 | 1.26 | 82.57  | 2.09 | 63.4 | 143.1 |
| 315.7 | 2.51 | 0.730 | 294.9 | 1.27 | 94.56  | 2.39 | 63.3 | 142.5 |
| 318.7 | 2.50 | 0.561 | 294.9 | 1.27 | 122.31 | 3.08 | 63.1 | 142.1 |
| 321.8 | 2.57 | 0.445 | 294.9 | 1.27 | 158.93 | 4.00 | 62.8 | 141.7 |
| 324.7 | 2.72 | 0.381 | 294.9 | 1.27 | 196.19 | 4.93 | 62.6 | 141.1 |
| 327.8 | 2.65 | 0.296 | 294.9 | 1.27 | 245.13 | 6.15 | 62.4 | 140.4 |
| 330.8 | 2.59 | 0.243 | 294.9 | 1.27 | 291.48 | 7.31 | 62.2 | 139.5 |
| 333.9 | 2.38 | 0.180 | 294.9 | 1.27 | 361.94 | 9.07 | 62.0 | 138.9 |

<sup>a</sup> Saturation temperature measured with the standard uncertainty ( $u(T) = 0.1$  K).

<sup>b</sup> Mass of transferred sample condensed at  $T = 243$  K.

<sup>c</sup> Volume of nitrogen ( $u(V) = 0.005$  dm<sup>3</sup>) used to transfer  $m$  ( $u(m) = 0.0001$  g) of the sample. Uncertainties are given as standard uncertainties.

<sup>d</sup>  $T_a$  is the temperature of the soap bubble meter used for measurement of the gas flow.

<sup>e</sup> Vapor pressure at temperature  $T$ , calculated from the  $m$  and the residual vapor pressure at the condensation temperature calculated by an iteration procedure.

<sup>f</sup> Standard uncertainties were calculated with  $u(p_i/\text{Pa}) = 0.005 + 0.025(p_i/\text{Pa})$  for pressures below 5 Pa and with  $u(p_i/\text{Pa}) = 0.025 + 0.025(p_i/\text{Pa})$  for pressures from 5 to 3000 Pa. The standard uncertainties for  $T$ ,  $V$ ,  $p$ ,  $m$ , are standard uncertainties with 0.683 confidence level. Uncertainties of the vaporization enthalpies are expressed as the expanded uncertainty (0.95 level of confidence,  $k = 2$ ). They were calculated according to a procedure described elsewhere.<sup>24,25</sup> Uncertainties include uncertainties from the experimental conditions and the fitting equation, vapor pressures, and uncertainties from adjustment of vaporization/sublimation enthalpies to the reference temperature  $T = 298$  K.

## Experimental vaporization enthalpies $\Delta_l^g H_m^o(298\text{ K})$

The experimental vapor pressures  $p_i$  temperature dependences measured in this work were fitted with the following equation<sup>24,25</sup>:

$$R \ln(p_i/p_{ref}) = a + \frac{b}{T} + \Delta_l^g C_{p,m}^o \ln\left(\frac{T}{T_0}\right) \quad (\text{S2}),$$

where  $R = 8.31446\text{ J}\cdot\text{K}^{-1}\cdot\text{mol}^{-1}$  is the molar gas constant, the reference pressure  $p_{ref} = 1\text{ Pa}$ ,  $a$  and  $b$  are adjustable parameters, the arbitrary temperature  $T_0$  applied in Eq. (S2) was chosen to be  $T_0 = 298\text{ K}$  and  $\Delta_l^g C_{p,m}^o$  is the difference of the molar heat capacities of the gas and the liquid phases respectively (see Table S11). Experimental vapor pressures measured in this work, have been used to obtain the enthalpies of vaporization of amino-alcohols using the following equation:

$$\Delta_l^g H_m^o(T) = -b + \Delta_l^g C_{p,m}^o \times T \quad (\text{S3})$$

Experimental vapor pressures temperature dependences were also used to derive the vaporization entropies at temperatures  $T$  by using the following equation:

$$\Delta_l^g S_m^o(T) = \Delta_l^g H_m^o/T + R \ln(p_i/p_{ref}) \quad (\text{S4})$$

Coefficients  $a$  and  $b$  of Eq. S2,  $\Delta_l^g H_m^o(T)$  and  $\Delta_l^g S_m^o(T)$  values are collected in Tables S9 and S10. The combined uncertainties of the vaporization enthalpies include uncertainties from the experimental conditions of transpiration, uncertainties in vapor pressure and uncertainties due to the temperature adjustment to  $T = 298\text{ K}$  as described elsewhere.<sup>24,25</sup>

**Table S11. Compilation of Data on Molar Heat Capacities  $C_{p,m}^o$  and Differences  $\Delta_l^g C_{p,m}^o$  of Amino-Alcohols, at 298 K in  $\text{J}\cdot\text{K}^{-1}\cdot\text{mol}^{-1}$**

| compound                     | $C_{p,m}^o(\text{liq})$ | $-\Delta_l^g C_{p,m}^o$ <sup>a</sup> |
|------------------------------|-------------------------|--------------------------------------|
| 1-amino-2-propanol [78-96-6] | 205.0 <sup>26</sup>     | 63.5                                 |
| 2-amino-1-butanol [96-20-8]  | 235.4 <sup>b</sup>      | 71.8                                 |

<sup>a</sup> Calculated according to the procedure developed by Chickos and Acree<sup>27</sup>.

<sup>b</sup> Calculated by the group-contribution procedure developed by Chickos *et al.*<sup>27,28</sup>.

**Table S12a. Compilation of Data Used for Evaluation of the Inter-Molecular Hydrogen Bonding in Linear Alcohols, Amines, and Alkanes (at 298 K, in kJ/mol)<sup>a</sup>**

| Homomorph         | $\Delta_l^g H_m^o(\text{exp})^{29}$ | Homomorph  | $\Delta_l^g H_m^o(\text{exp})^{29}$ | $\text{HB}_{\text{inter}}^b$ |
|-------------------|-------------------------------------|------------|-------------------------------------|------------------------------|
| <i>n-alcohols</i> |                                     |            |                                     |                              |
| methanol          | 37.8                                | ethane     | 9.76                                | -28.0                        |
| ethanol           | 42.5                                | n-propane  | 16.2                                | -26.3                        |
| 1-propanol        | 47.5                                | n-butane   | 22.4                                | -25.1                        |
| 1-butanol         | 52.4                                | n-pentane  | 26.7                                | -25.7                        |
| 1-pentanol        | 56.9                                | n-hexane   | 31.7                                | -25.2                        |
| 1-hexanol         | 61.1                                | n-heptane  | 36.5                                | -24.6                        |
| 1-heptanol        | 66.8                                | n-octane   | 41.5                                | -25.3                        |
| 1-octanol         | 70.1                                | n-nonane   | 46.5                                | -23.6                        |
| 1-nonanol         | 76.9                                | n-decane   | 51.4                                | -25.5                        |
| 1-decanol         | 80.9                                | n-undecane | 56.3                                | -24.6                        |
| <i>n-amines</i>   |                                     |            |                                     |                              |
| 1-propanamine     | 31.3                                | n-butane   | 22.4                                | -8.9                         |
| 1-butanamine      | 35.7                                | n-pentane  | 26.7                                | -9.0                         |
| 1-pentanamine     | 40.5                                | n-hexane   | 31.7                                | -8.8                         |
| 1-hexanamine      | 45.3                                | n-heptane  | 36.5                                | -8.8                         |
| 1-heptanamine     | 50.1                                | n-octane   | 41.5                                | -8.6                         |

<sup>a</sup> Uncertainties are  $\pm 0.2$  kJ/mol (twice the standard deviation)

<sup>b</sup> Measure of the inter-molecular hydrogen bonding (difference between column 2 and 4)

**Table S12b. Compilation of Data Used for Evaluation of the Inter-Molecular Hydrogen Bonding in Branched Alcohols (at 298 K, in kJ/mol)<sup>a</sup>**

| CAS        | Homomorph           | $\Delta_l^g H_m^o$           | CAS       | Homomorph       | $\Delta_l^g H_m^o$           | $\text{HB}_{\text{inter}}(\text{ROH})^b$ |
|------------|---------------------|------------------------------|-----------|-----------------|------------------------------|------------------------------------------|
| 78-92-2    | 2-butanol           | 49.8 $\pm$ 0.2 <sup>29</sup> | 78-78-4   | 2-methylbutane  | 25.2 $\pm$ 0.2 <sup>29</sup> | 24.6 <sup>b</sup>                        |
| 584-02-1   | 3-pentanol          | 54.0 $\pm$ 0.2 <sup>29</sup> | 96-14-0   | 3-methylpentane | 30.5 $\pm$ 0.2 <sup>29</sup> | 23.5                                     |
| 623-37-0   | 3-hexanol           | 58.6 $\pm$ 0.4 <sup>30</sup> | 589-34-4  | 3-methylhexane  | 35.2 $\pm$ 0.2 <sup>29</sup> | 23.4                                     |
| 589-82-2   | 3-heptanol          | 63.1 $\pm$ 0.7 <sup>c</sup>  | 589-81-1  | 3-methylheptane | 39.9 $\pm$ 0.2 <sup>29</sup> | 23.2                                     |
| 589-98-0   | 3-octanol           | 67.6 $\pm$ 0.7 <sup>c</sup>  | 2216-33-3 | 3-methyloctane  | 44.9 $\pm$ 0.2 <sup>29</sup> | 22.7                                     |
| 624-51-1   | 3-nonanol           | 70.9 $\pm$ 0.3 <sup>31</sup> | 5911-04-6 | 3-methylnonane  | 49.7 $\pm$ 0.2 <sup>29</sup> | 21.2                                     |
| 78-83-1    | 2-methyl-propanol   | 50.9 $\pm$ 0.2 <sup>29</sup> | 78-78-4   | 2-methylbutane  | 25.2 $\pm$ 0.2 <sup>29</sup> | 25.7                                     |
| 137-32-6   | 2-methyl-1-butanol  | 54.6 $\pm$ 1.3 <sup>32</sup> | 96-14-0   | 3-methylpentane | 30.5 $\pm$ 0.2 <sup>29</sup> | 24.1                                     |
| 105-30-6   | 2-methyl-1-pentanol | 59.4 $\pm$ 0.3 <sup>30</sup> | 589-34-4  | 3-methylhexane  | 35.2 $\pm$ 0.2 <sup>29</sup> | 24.2                                     |
| 624-22-6   | 2-methyl-1-hexanol  | 63.9 $\pm$ 0.7 <sup>c</sup>  | 589-81-1  | 3-methylheptane | 39.9 $\pm$ 0.2 <sup>29</sup> | 24.0                                     |
| 60435-70-3 | 2-methyl-1-heptanol | 68.4 $\pm$ 0.7 <sup>c</sup>  | 2216-33-3 | 3-methyloctane  | 44.9 $\pm$ 0.2 <sup>29</sup> | 23.5                                     |
| 818-81-5   | 2-methyl-1-octanol  | 72.9 $\pm$ 0.7 <sup>c</sup>  | 5911-04-6 | 3-methylnonane  | 49.7 $\pm$ 0.2 <sup>29</sup> | 23.2                                     |

<sup>a</sup> Uncertainties are twice the standard deviation.

<sup>b</sup> Measure of the inter-molecular hydrogen bonding (difference between column 3 and 6)

<sup>c</sup> Derived by adding the  $[\text{CH}_2] = 4.5$  kJ/mol contributions

**Table S12c. Compilation of Data Used for Evaluation of the Inter-Molecular Hydrogen Bonding in Branched Amines (at 298 K, in kJ/mol)<sup>a</sup>**

| CAS          | Homomorph              | $\Delta_f^q H_m^o$     | CAS       | Homomorph       | $\Delta_f^q H_m^o$     | HB <sub>inter</sub> (ROH) <sup>b</sup> |
|--------------|------------------------|------------------------|-----------|-----------------|------------------------|----------------------------------------|
| 78-81-9      | 2-Methyl-1-propanamine | 34.0±0.2 <sup>29</sup> | 78-78-4   | 2-methylbutane  | 25.2±0.2 <sup>29</sup> | 8.8                                    |
| 96-15-1      | 2-Methyl-1-butanamine  | 38.9±0.5 <sup>c</sup>  | 96-14-0   | 3-methylpentane | 30.5±0.2 <sup>29</sup> | 8.4                                    |
| 13364-16-4   | 2-Methyl-1-pentanamine | 43.7±0.5 <sup>c</sup>  | 589-34-4  | 3-methylhexane  | 35.2±0.2 <sup>29</sup> | 8.5                                    |
| 44652-67-7   | 2-Methyl-1-hexanamine  | 48.5±0.5 <sup>c</sup>  | 589-81-1  | 3-methylheptane | 39.9±0.2 <sup>29</sup> | 8.6                                    |
| 101084-50-8  | 2-Methyl-1-heptanamine | 53.4±0.7 <sup>d</sup>  | 2216-33-3 | 3-methyloctane  | 44.9±0.2 <sup>29</sup> | 8.5                                    |
| 1081974-54-0 | 2-Methyl-1-octanamine  | 58.3±0.7 <sup>d</sup>  | 5911-04-6 | 3-methylnonane  | 49.7±0.2 <sup>29</sup> | 8.6                                    |
|              |                        |                        |           |                 |                        |                                        |
| 13952-84-6   | 2-butanamine           | 32.7±0.2 <sup>29</sup> | 78-78-4   | 2-methylbutane  | 25.2±0.2 <sup>29</sup> | 7.5                                    |
| 616-24-0     | 3-pentanamine          | 37.9±0.7 <sup>c</sup>  | 96-14-0   | 3-methylpentane | 30.5±0.2 <sup>29</sup> | 7.4                                    |
| 16751-58-9   | 3-hexanamine           | 42.6±0.7 <sup>c</sup>  | 589-34-4  | 3-methylhexane  | 35.2±0.2 <sup>29</sup> | 7.4                                    |
| 28292-42-4   | 3-heptanamine          | 47.3±0.7 <sup>c</sup>  | 589-81-1  | 3-methylheptane | 39.9±0.2 <sup>29</sup> | 7.4                                    |
| 24552-04-3   | 3-octanamine           | 51.3±0.7 <sup>b</sup>  | 2216-33-3 | 3-methyloctane  | 44.9±0.2 <sup>29</sup> | 6.4                                    |
| 33787-95-0   | 3-nonanamine           | 55.3±0.7 <sup>c</sup>  | 5911-04-6 | 3-methylnonane  | 49.7±0.2 <sup>29</sup> | 5.6                                    |

<sup>a</sup> Uncertainties are twice the standard deviation.

<sup>b</sup> Measure of the inter-molecular hydrogen bonding (difference between column 3 and 6)

<sup>c</sup> From Table S13

<sup>d</sup> From Table S14

**Table S12d. Compilation of Data Used for Evaluation of the Inter-Molecular Hydrogen Bonding in Alcohols and Amines (at 298 K, in kJ/mol)<sup>a</sup>**

| CAS        | Homomorph           | $\Delta_f^q H_m^o$     | HB <sub>inter</sub> (ROH) <sup>b</sup> | CAS          | Homomorph              | $\Delta_f^q H_m^o$     | HB <sub>inter</sub> (RNH2) <sup>c</sup> | HB <sub>inter</sub> <sup>d</sup> |
|------------|---------------------|------------------------|----------------------------------------|--------------|------------------------|------------------------|-----------------------------------------|----------------------------------|
| 78-92-2    | 2-butanol           | 49.8±0.2 <sup>29</sup> | 24.6                                   | 78-81-9      | 2-Methyl-1-propanamine | 34.0±0.2 <sup>29</sup> | 8.8                                     | 33.4                             |
| 584-02-1   | 3-pentanol          | 54.0±0.2 <sup>29</sup> | 23.5                                   | 96-15-1      | 2-Methyl-1-butanamine  | 38.9±0.5 <sup>f</sup>  | 8.4                                     | 31.9                             |
| 623-37-0   | 3-hexanol           | 58.6±0.4 <sup>30</sup> | 23.4                                   | 13364-16-4   | 2-Methyl-1-pentanamine | 43.7±0.5 <sup>f</sup>  | 8.5                                     | 31.9                             |
| 589-82-2   | 3-heptanol          | 63.1±0.7 <sup>e</sup>  | 23.2                                   | 44652-67-7   | 2-Methyl-1-hexanamine  | 48.5±0.5 <sup>f</sup>  | 8.6                                     | 31.8                             |
| 589-98-0   | 3-octanol           | 67.6±0.7 <sup>e</sup>  | 22.7                                   | 101084-50-8  | 2-Methyl-1-heptanamine | 53.4±0.7 <sup>g</sup>  | 8.5                                     | 31.2                             |
| 624-51-1   | 3-nonanol           | 70.9±0.3 <sup>31</sup> | 21.2                                   | 1081974-54-0 | 2-Methyl-1-octanamine  | 58.3±0.7 <sup>g</sup>  | 8.6                                     | 29.8                             |
|            |                     |                        |                                        |              |                        |                        |                                         |                                  |
| 78-83-1    | 2-methyl-propanol   | 50.9±0.2 <sup>29</sup> | 25.7                                   | 13952-84-6   | 2-butanamine           | 32.7±0.2 <sup>29</sup> | 7.5                                     | 33.2                             |
| 137-32-6   | 2-methyl-1-butanol  | 54.6±1.3 <sup>32</sup> | 24.1                                   | 616-24-0     | 3-pentanamine          | 37.9±0.5 <sup>f</sup>  | 7.4                                     | 31.5                             |
| 105-30-6   | 2-methyl-1-pentanol | 59.4±0.3 <sup>30</sup> | 24.2                                   | 16751-58-9   | 3-hexanamine           | 42.6±0.5 <sup>f</sup>  | 7.4                                     | 31.6                             |
| 624-22-6   | 2-methyl-1-hexanol  | 63.9±0.7 <sup>e</sup>  | 24.0                                   | 28292-42-4   | 3-heptanamine          | 47.3±0.5 <sup>f</sup>  | 7.4                                     | 31.4                             |
| 60435-70-3 | 2-methyl-1-heptanol | 68.4±0.7 <sup>e</sup>  | 23.5                                   | 24552-04-3   | 3-octanamine           | 51.3±0.5 <sup>f</sup>  | 6.4                                     | 29.9                             |
| 818-81-5   | 2-methyl-1-octanol  | 72.9±0.7 <sup>e</sup>  | 23.2                                   | 33787-95-0   | 3-nonanamine           | 55.3±0.5 <sup>f</sup>  | 5.6                                     | 28.8                             |

<sup>a</sup> Uncertainties are twice the standard deviation.

<sup>b</sup> From Table S12b.

<sup>c</sup> From Table S12c.

<sup>d</sup> Measure of the inter-molecular hydrogen bonding (difference between column 3 and 6)

<sup>e</sup> Derived by adding the [CH<sub>2</sub>] = 4.5 kJ/mol contributions

<sup>f</sup> From Table S13.

<sup>g</sup> From Table S14.



**Table S13. Compilation of Data Used for Correlation of Normal Boiling Temperatures  $T_b$  and Experimental Standard Molar Vaporization Enthalpies,  $\Delta_l^g H_m^o(\text{exp})$ , of Amines (at 298 K, in kJ/mol)<sup>a</sup>**

| CAS          | Homomorph              | $T_b$ <sup>33</sup> | $\Delta_l^g H_m^o(\text{exp})$ | $\Delta_l^g H_m^o(\text{calc})$ <sub>b</sub> | $\Delta^c$ |
|--------------|------------------------|---------------------|--------------------------------|----------------------------------------------|------------|
| 78-81-9      | 2-methyl-1-propanamine | 341                 | 34.0±0.2 <sup>29</sup>         |                                              | -0.2       |
| 96-15-1      | 2-methyl-1-butanamine  | 369                 |                                | 38.9±0.5                                     |            |
| 13364-16-4   | 2-methyl-1-pentanamine | 395                 |                                | 43.7±0.5                                     |            |
| 44652-67-7   | 2-methyl-1-hexanamine  | 421                 |                                | 48.5±0.5                                     |            |
| 101084-50-8  | 2-methyl-1-heptanamine | -                   |                                |                                              |            |
| 1081974-54-0 | 2-methyl-1-octanamine  | -                   |                                |                                              |            |
|              |                        |                     |                                |                                              |            |
| 13952-84-6   | 2-butanamine           | 336                 | 32.7±0.2 <sup>29</sup>         |                                              | 0.1        |
| 616-24-0     | 3-pentanamine          | 363                 |                                | 37.9±0.5                                     |            |
| 16751-58-9   | 3-hexanamine           | 389                 |                                | 42.6±0.5                                     |            |
| 28292-42-4   | 3-heptanamine          | 414                 |                                | 47.3±0.5                                     |            |
| 24552-04-3   | 3-octanamine           | 436                 |                                | 51.3±0.5                                     |            |
| 33787-95-0   | 3-nonanamine           | 458                 |                                | 55.3±0.5                                     |            |
|              |                        |                     |                                |                                              |            |
| 109-73-9     | 1-butanamine           | 351                 | 35.8±0.2 <sup>29</sup>         |                                              | 0.1        |
| 110-58-7     | 1-pentanamine          | 378                 | 40.2±0.2 <sup>29</sup>         |                                              | -0.4       |
| 111-26-2     | 1-hexanamine           | 403                 | 45.1±0.2 <sup>29</sup>         |                                              | -0.1       |
| 111-68-2     | 1-heptanamine          | 429                 | 50.0±0.2 <sup>29</sup>         |                                              | 0.0        |
| 111-86-4     | 1-octanamine           | 452                 | 54.6±0.2 <sup>29</sup>         |                                              | 0.4        |
| 104-75-6     | 2-ethyl-1-hexanamine   | 442                 | 52.2±0.2 <sup>29</sup>         |                                              | -0.2       |
| 112-20-9     | 1-nonanamine           | 475                 |                                | 58.4±0.5                                     |            |
| 75-64-9      | tert-butylamine        | 318                 | 29.9±0.2 <sup>29</sup>         |                                              | 0.1        |

<sup>a</sup> Uncertainties are twice the standard deviation.

<sup>b</sup> Calculated according to the empirical equation, derived from the data collected in this table:

$$\Delta_l^g H_m^o(\text{calc}) = 0.1834 \times T_b - 28.7 \text{ with } R^2 = 0.9992$$

<sup>c</sup> Difference exp. – calc.

**Table S14. Compilation of Data Used for Correlation of Chain Length,  $N_C$ , and Experimental Standard Molar Vaporization Enthalpies,  $\Delta_l^g H_m^o(\text{exp})$ , of Amines (at 298 K, in kJ/mol)<sup>a</sup>**

| CAS          | Homomorph              | $N_C$ | $\Delta_l^g H_m^o(\text{empiric})$ <sup>b</sup> | $\Delta_l^g H_m^o(\text{calc})$ <sup>c</sup> | $\Delta^d$ |
|--------------|------------------------|-------|-------------------------------------------------|----------------------------------------------|------------|
| 78-81-9      | 2-methyl-1-propanamine | 3     | 33.9                                            | 34.0                                         | -0.1       |
| 96-15-1      | 2-methyl-1-butanamine  | 4     | 38.9                                            | 38.8                                         | 0.1        |
| 13364-16-4   | 2-methyl-1-pentanamine | 5     | 43.7                                            | 43.7                                         | 0.0        |
| 44652-67-7   | 2-methyl-1-hexanamine  | 6     | 48.5                                            | 48.6                                         | -0.1       |
| 101084-50-8  | 2-methyl-1-heptanamine | 7     |                                                 | 53.4                                         |            |
| 1081974-54-0 | 2-methyl-1-octanamine  | 8     |                                                 | 58.3                                         |            |
| 44995-93-9   | 2-methyl-1-octanamine  | 9     |                                                 | 63.1                                         |            |

<sup>a</sup> Uncertainties are twice the standard deviation.

<sup>b</sup> From Table S13.

<sup>c</sup> Calculated according to the empirical equation, derived from the data collected in this table:

$$\Delta_l^g H_m^o(\text{calc}) = 4.86 \times N_C + 19.4 \text{ with } R^2 = 0.9999$$

<sup>d</sup> Difference empiric – calc.

**Table S15. Data Used for Determination of Intramolecular Hydrogen Bonding in Dialkylaminoalcohols.**

| CAS      | Compound                   | $\Delta_l^g H_m^o(298\text{ K})$ | $\Sigma$ incr | HB <sub>intra</sub> <sup>c</sup> |
|----------|----------------------------|----------------------------------|---------------|----------------------------------|
| 108-01-0 | 2-(dimethyl-amino)-ethanol | 47.1±0.1 <sup>18,19</sup>        | 56.7          | -9.6                             |
| 100-37-8 | 2-(diethyl-amino)-ethanol  | 52.6±0.2 <sup>18,19</sup>        | 62.5          | -9.9                             |

**Table S16. Parameters of the NBO-Analysis for Aminoalcohols Intramolecular Hydrogen Bonding**

| compound                                 | Donor NBO<br>(i) | Acceptor NBO<br>(j) | $\Delta E^{(2)}_{n \rightarrow \sigma^*} /$<br>kcal·mol <sup>-1</sup> | E(j)-E(i) /<br>a.u. | F (i,j) /<br>a.u. | qCT / e |
|------------------------------------------|------------------|---------------------|-----------------------------------------------------------------------|---------------------|-------------------|---------|
| 2-amino-ethanol (OH···N)                 | N 2              | O 6 - H 7           | 4.35                                                                  | 0.81                | 0.053             | 0.00856 |
| 2-amino-ethanol (NH···O)                 | O 7              | N 9 - H 10          | 0.65                                                                  | 0.80                | 0.021             | 0.00138 |
| 2-amino-1-propanol (OH···N)              | N 4              | O 8 - H 9           | 4.89                                                                  | 0.81                | 0.056             | 0.00956 |
| 2-amino-1-propanol (NH···O)              | O 9              | N 11 - H 13         | 0.95                                                                  | 0.80                | 0.025             | 0.00195 |
| 2-amino-1-butanol (OH···N)               | N 4              | O 9 - H 10          | 5.09                                                                  | 0.80                | 0.058             | 0.01051 |
| 2-amino-1-butanol (NH···O)               | O 13             | N 15 - H 17         | 1.22                                                                  | 0.81                | 0.028             | 0.00239 |
| 2-amino-1-pentanol (OH···N)              | N 4              | O 8 - H 9           | 5.12                                                                  | 0.80                | 0.058             | 0.01051 |
| 2-amino-1-pentanol (NH···O)              | O 12             | N 14 - H 16         | 1.23                                                                  | 0.81                | 0.028             | 0.00239 |
| 2-amino-1-hexanol (OH···N)               | N 4              | O 8 - H 9           | 5.13                                                                  | 0.80                | 0.058             | 0.01051 |
| 2-amino-1-hexanol (NH···O)               | O 12             | N 14 - H 16         | 1.23                                                                  | 0.81                | 0.028             | 0.00239 |
| 1-amino-2-propanol (OH···N)              | N 12             | O 10 - H 11         | 5.29                                                                  | 0.81                | 0.059             | 0.01061 |
| 1-amino-2-propanol (NH···O)              | O 9              | N 4 - H 6           | 0.51                                                                  | 1.08                | 0.021             | 0.00076 |
| 2-(dimethyl-amino)-1-ethanol<br>(OH···N) | N 3              | O 16 - H 17         | 3.64                                                                  | 0.77                | 0.049             | 0.00810 |

## References

- (1) Krueger, P. J.; Mettee, H. D. Spectroscopic Studies of Alcohols: VI. Intramolecular Hydrogen Bonds in Ethanolamine and its O- and N-Methyl Derivatives. *Can. J. Chem.* **1965**, *43* (11), 2970-2977.
- (2) Erbel, K.; Mierzecki, R. Equilibrium and Enthalpy of Conformational Rearrangement of Ethanolamines in Solutions Studied by IR Spectra. *Pol. J. Chem.* **1980**, *54* (3), 529-37.
- (3) Kelterer, A. M.; Ramek, M. Intramolecular Hydrogen Bonding in 2-Aminoethanol, 3-Aminopropanol and 4-Aminobutanol. THEOCHEM, *J. Mol. Struct.* **1991**, *232*, 189-201. [https://doi.org/10.1016/0166-1280\(91\)85254-5](https://doi.org/10.1016/0166-1280(91)85254-5).
- (4) Seebacher, U.; Ramek, M. Structure-Energy Relationship In  $\omega$ -Amino Acids and Related Compounds. *Amino Acids* **1994**, *7* (2), 223-230.
- (5) Chang, Y. P.; Su, T. M.; Li, T. W.; Chao, I. Intramolecular Hydrogen Bonding, Gauche Interactions, and Thermodynamic Functions of 1, 2-Ethanediamine, 1, 2-Ethandiol, and 2-Aminoethanol: A Global Conformational Analysis. *J. Phys. Chem. A* **1997**, *101* (34), 6107-6117.
- (6) Nagy, P. I. Theoretical Studies of the Solvent Effect on the Conformation of the HO-C-C-X (X= F, NH<sub>2</sub>, NO<sub>2</sub>) Moiety with Competing Intra- and Intermolecular Hydrogen Bonds. *J. Phys. Chem. A* **2012**, *116* (29), 7726-7741.
- (7) Rosenberg, R. E. Can 2-X-Ethanol Form Intramolecular Hydrogen Bonds? *J. Phys. Chem. A* **2019**, *123* (35), 7651-7660.
- (8) Mulla, S. T.; Jose, C. I. Intramolecular Hydrogen Bonding and Intermolecular Association of Amino Alcohols. *J. Chem. Soc. Faraday Trans. I* **1986**, *82* (3), 691-706.

- (9) Raymonde, M.- N.; Maurette, M. T.; Godechot, C.; Armand, L. Spectroscopic Studies of Hydrogen Bonding in Aliphatic and Aromatic Amino Alcohols. *Bul. Soc. Chim. France* **1970**, 8-9, 3047-3056.
- (10) Erbel, K.; Mierzecki, R. Infrared Studies on Conformation of Ethanolamine in Solution. *Polish J. Chem.* **1978**, 52, 1993-2000.
- (11) Silva, C. F. P.; Duarte, M. L. T. S.; Fausto, R. A Concerted SCF-MO Ab Initio and Vibrational Spectroscopic Study of the Conformational Isomerism in 2-Aminoethanol. *J. Mol. Struct.* **1999**, 482, 591-599.
- (12) Kharitonov, Y.Y.; Khoshabova, É.G.; Rodnikova, M.N. IR Absorption Spectra of Some Aminoalcohols in the Gas Phase. *Russ. Chem. Bull.* **1990**, 39 (6), 1190-1199.  
<https://doi.org/10.1007/BF00962382>.
- (13) Cacela, C.; Fausto, R.; Duarte, M. L. A Combined Matrix-Isolation Infrared Spectroscopy and MO Study of 1-Amino-2-propanol. *Vib. Spectrosc.* **2001**, 26, 113-131.
- (14) Thomsen, D. L.; Axson, J. L.; Schröder, S. D.; Lane, J. R.; Vaida, V.; Kjaergaard, H. G. Intramolecular Interactions in 2-Aminoethanol and 3-Aminopropanol. *J. Phys. Chem. A* **2013**, 117 (40), 10260-10273.
- (15) Seurre, N.; Sepiół, J.; Le Barbu-Debus, K.; Lahmani, F.; Zehnacker-Rentien, A. The role of chirality in the competition between inter and intramolecular hydrogen bonds: jet-cooled van der Waals complexes of ( $\pm$ ) 2-naphthyl-1-ethanol with ( $\pm$ ) 1-amino-2-propanol and ( $\pm$ ) 2-amino-1-butanol. *Physical Chemistry Chemical Physics* **2004**, 6 (10), 2867-2877.
- (16) Gaidaenko, V. P.; Ginzburg, I. M.; Ioffe, D. V. Spectroscopic Study of Hydrogen Bonding in Amino Alcohols. *Opt. and Spectrosc.* **1969**, 27 (4), 620-624.
- (17) Curtiss L.A.; Redfern P.C.; Raghavachari K. Gaussian-4 Theory. *J. Chem. Phys.* **2007**, 126, 84108-84112.
- (18) Verevkin, S. P.; Andreeva, I. V.; Konnova, M. E.; Portnova, S. V.; Zherikova, K. V.; Pimerzin, A. A. Paving the Way to the Sustainable Hydrogen Storage: Thermochemistry of Amino-alcohols as Precursors for the Liquid Organic Hydrogen Carriers. *J. Chem. Thermodyn.* **2021**, 163, 106610.  
<https://doi.org/10.1016/j.jct.2021.106610>
- (19) Verevkin, S. P.; Konnova, M. E.; Zherikova, K. V.; Pimerzin, A. A. Sustainable Hydrogen Storage: Thermochemistry of Amino-alcohols as Seminal Liquid Organic Hydrogen Carriers. *J. Chem. Thermodyn.* **2021**, 106591. <https://doi.org/10.1016/j.jct.2021>.
- (20) Schleyer, P. V. R.; Williams Jr, J. E.; Blanchard, K. R. Evaluation of Strain in Hydrocarbons. The Strain in Adamantane and its Origin. *J. Am. Chem. Soc.* **1970**, 92 (8), 2377-2386.
- (21) Verevkin S.P. Thermochemistry of Amines: Experimental Standard Molar Enthalpies of Formation of N-Alkylated Piperidines. *Struct. Chem.* **1998**, 9 (2), 113-119.
- (22) Verevkin S.P. Thermochemistry of Alcohols: Experimental Standard Molar Enthalpies of Formation and Strain of Some Alkyl and Phenyl Congested Alcohols. *Struct. Chem.* **1998**, 9 (5), 375-382.
- (23) Zaitsau, D. H.; Verevkin, S. P.; Sazonova, A. Y. Vapor Pressures and Vaporization Enthalpies of 5-Nonanone, Linalool and 6-Methyl-5-hepten-2-one. Data Evaluation. *Fluid Phase Equilib.* **2015**, 386, 140-148.
- (24) Verevkin, S. P.; Sazonova, A. Y.; Emel'yanenko, V. N.; Zaitsau, D. H.; Varfolomeev, M. A.; Solomonov, B. N.; Zherikova, K. V. Thermochemistry of Halogen-Substituted Methylbenzenes. *J. Chem. Eng. Data* **2015**, 60 (1), 89-103.
- (25) Emel'yanenko, V. N.; Verevkin, S. P. Benchmark Thermodynamic Properties of 1, 3-Propanediol: Comprehensive Experimental and Theoretical Study. *J. Chem. Thermodyn.* **2015**, 85, 111-119.
- (26) Mundhwa, M.; Henni, A. Molar Heat Capacity of Various Aqueous Alkanolamine Solutions from 303.15 K to 353.15 K. *J. Chem. Eng. Data* **2007**, 52 (2), 491-498.
- (27) Acree Jr, W.; Chickos, J. S. Phase Transition Enthalpy Measurements of Organic and Organometallic Compounds. Sublimation, Vaporization and Fusion Enthalpies From 1880 to 2015.

Part 1. C1 – C10. *J. Phys. Chem. Ref. Data* **2016**, *45* (3), 033101.

<https://doi.org/10.1063/1.4948363>.

(28) Chickos, J. S.; Hosseini, S.; Hesse, D. G.; Liebman, J. F. Heat Capacity Corrections to a Standard State: A Comparison of New and Some Literature Methods for Organic Liquids and Solids. *Struct. Chem.* **1993**, *4* (4), 271-278. <https://doi.org/10.1007/BF00673701>.

(29) Majer, V.; Svoboda, V. *Enthalpies of Vaporization of Organic Compounds: A Critical Review and Data Compilation*; Blackwell Scientific Publications: Oxford, 1985; pp 1-300.

(30) Kulikov, D.; Verevkin S. P.; Heintz, A. Enthalpies of Vaporization of a Series of Aliphatic Alcohols: Experimental Results and Values Predicted by the ERAS-Model. *Fluid Phase Equilib.* **2001**, *192* (1-2), 187-207. [https://doi.org/10.1016/S0378-3812\(01\)00633-1](https://doi.org/10.1016/S0378-3812(01)00633-1).

(31) Verevkin, S. P.; Schick, C. Vapour Pressures and Heat Capacity Measurements on the C7–C9 Secondary Aliphatic Alcohols. *J. Chem. Thermodyn.* **2007**, *39* (5), 758-766.

<https://doi.org/10.1016/j.jct.2006.10.007>.

(32) Chao, J.; Rossini, F. D. Heats of Combustion, Formation, and Isomerization of Nineteen Alkanols. *J. Chem. Eng. Data* **1965**, *10* (4), 374-379.

(33) NIST Chemistry WebBook. NIST Standard Reference Database Number 69.

<https://webbook.nist.gov/chemistry/>
